# Supplementary material
Source: publisher figshare collection journal article supplement (https://plos.figshare.com/articles/dataset/_/115284)

Fig. S4: Phylogeny of PPOD-related Domains

Phylogeny of PPOD-related domains

Accession # Residues Domain architectures of full-length proteins

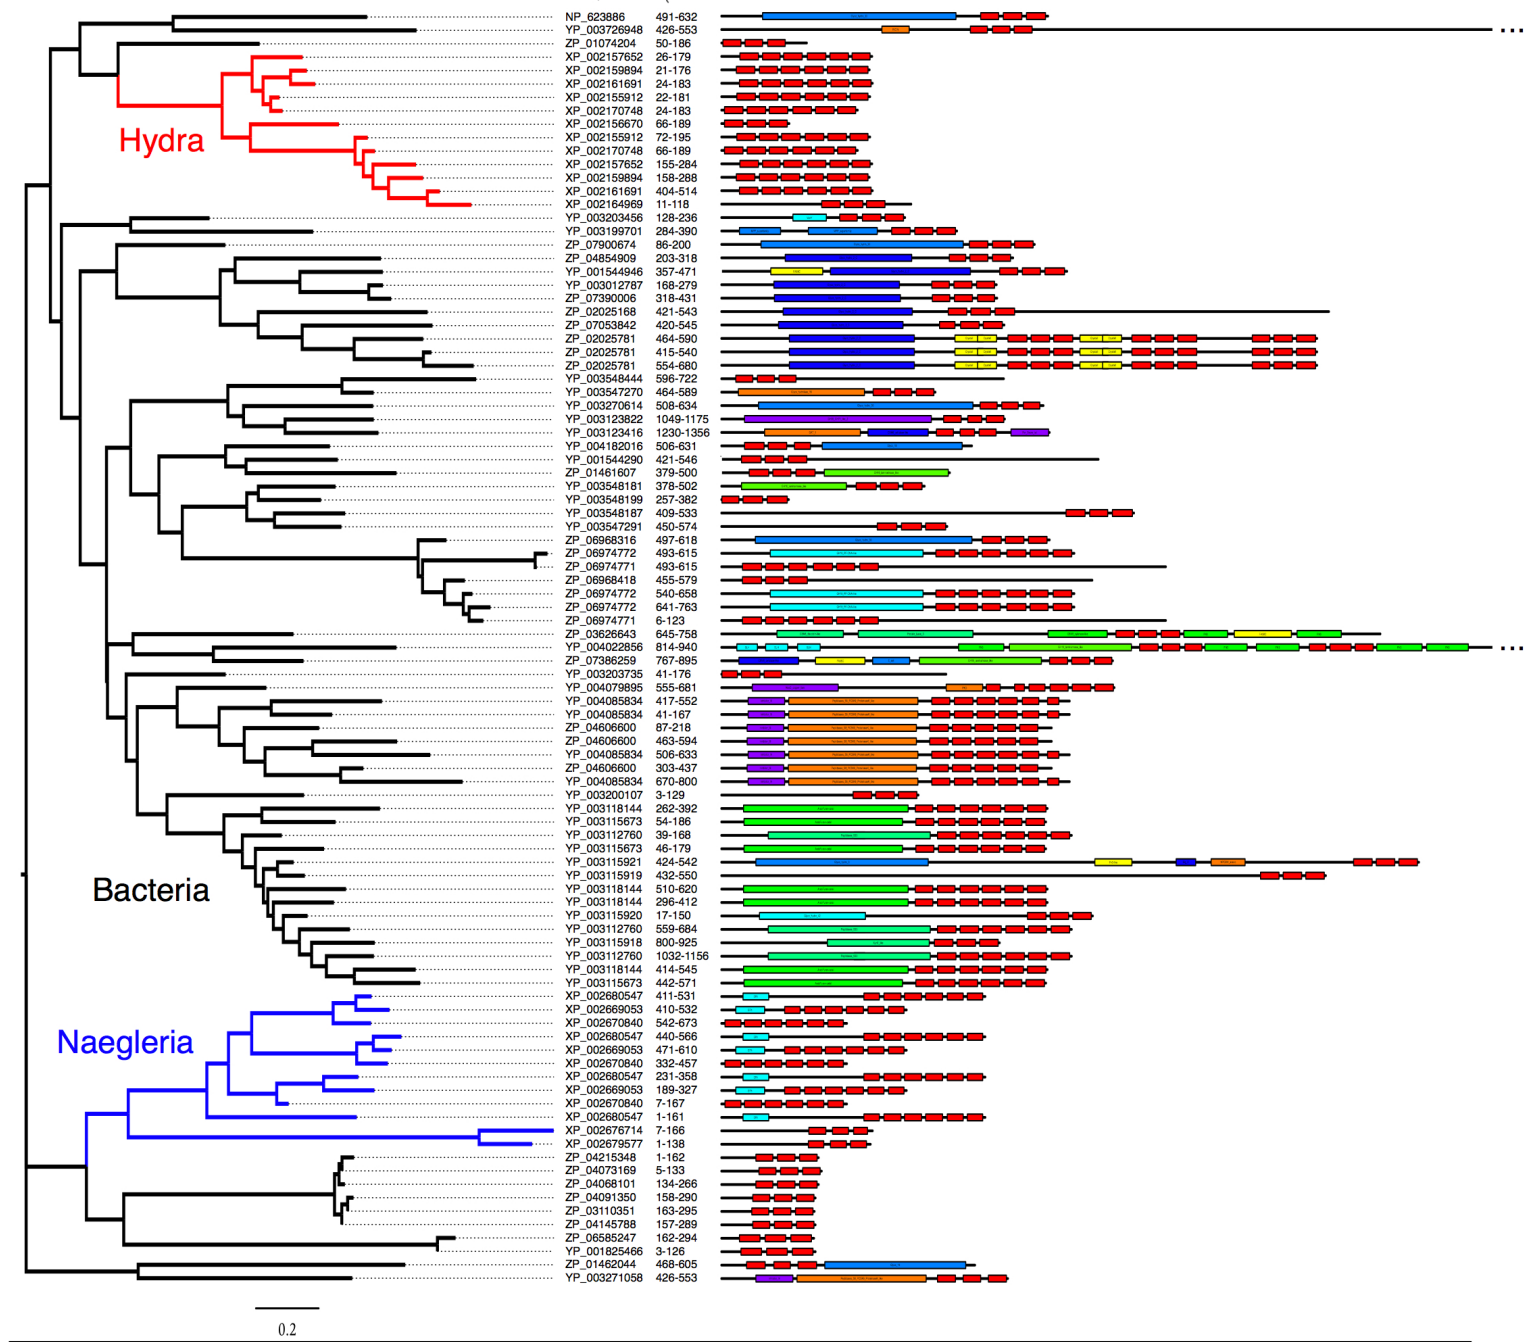

Supplement: Supplementary file 1 [file 1 › Figure_S4.pdf]
