# Supplementary material
Source: publisher figshare collection journal article supplement (https://plos.figshare.com/articles/dataset/_/115284)
Supplement: Supplementary file [file 1]

Fig. S5: PPOD Comparative Structural Model

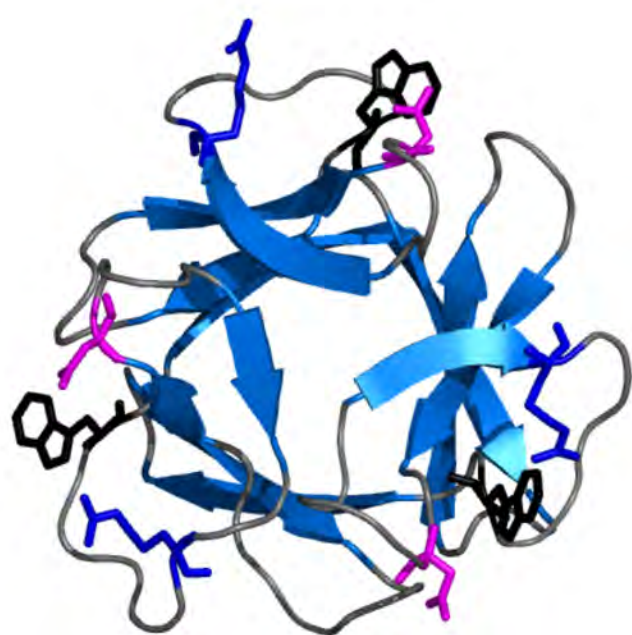

PPOD-model

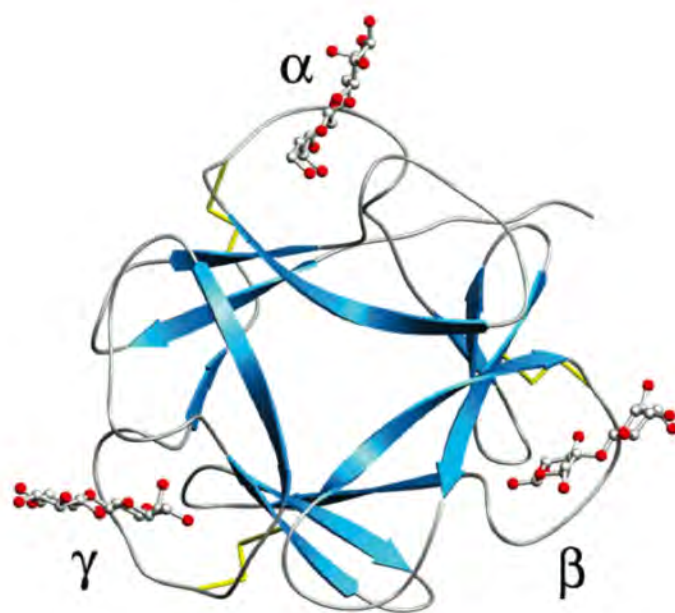

Xylanase 10A *Streptomyces lividans*
