# Supplementary material
Source: publisher figshare collection journal article supplement (https://plos.figshare.com/articles/dataset/_/115284)

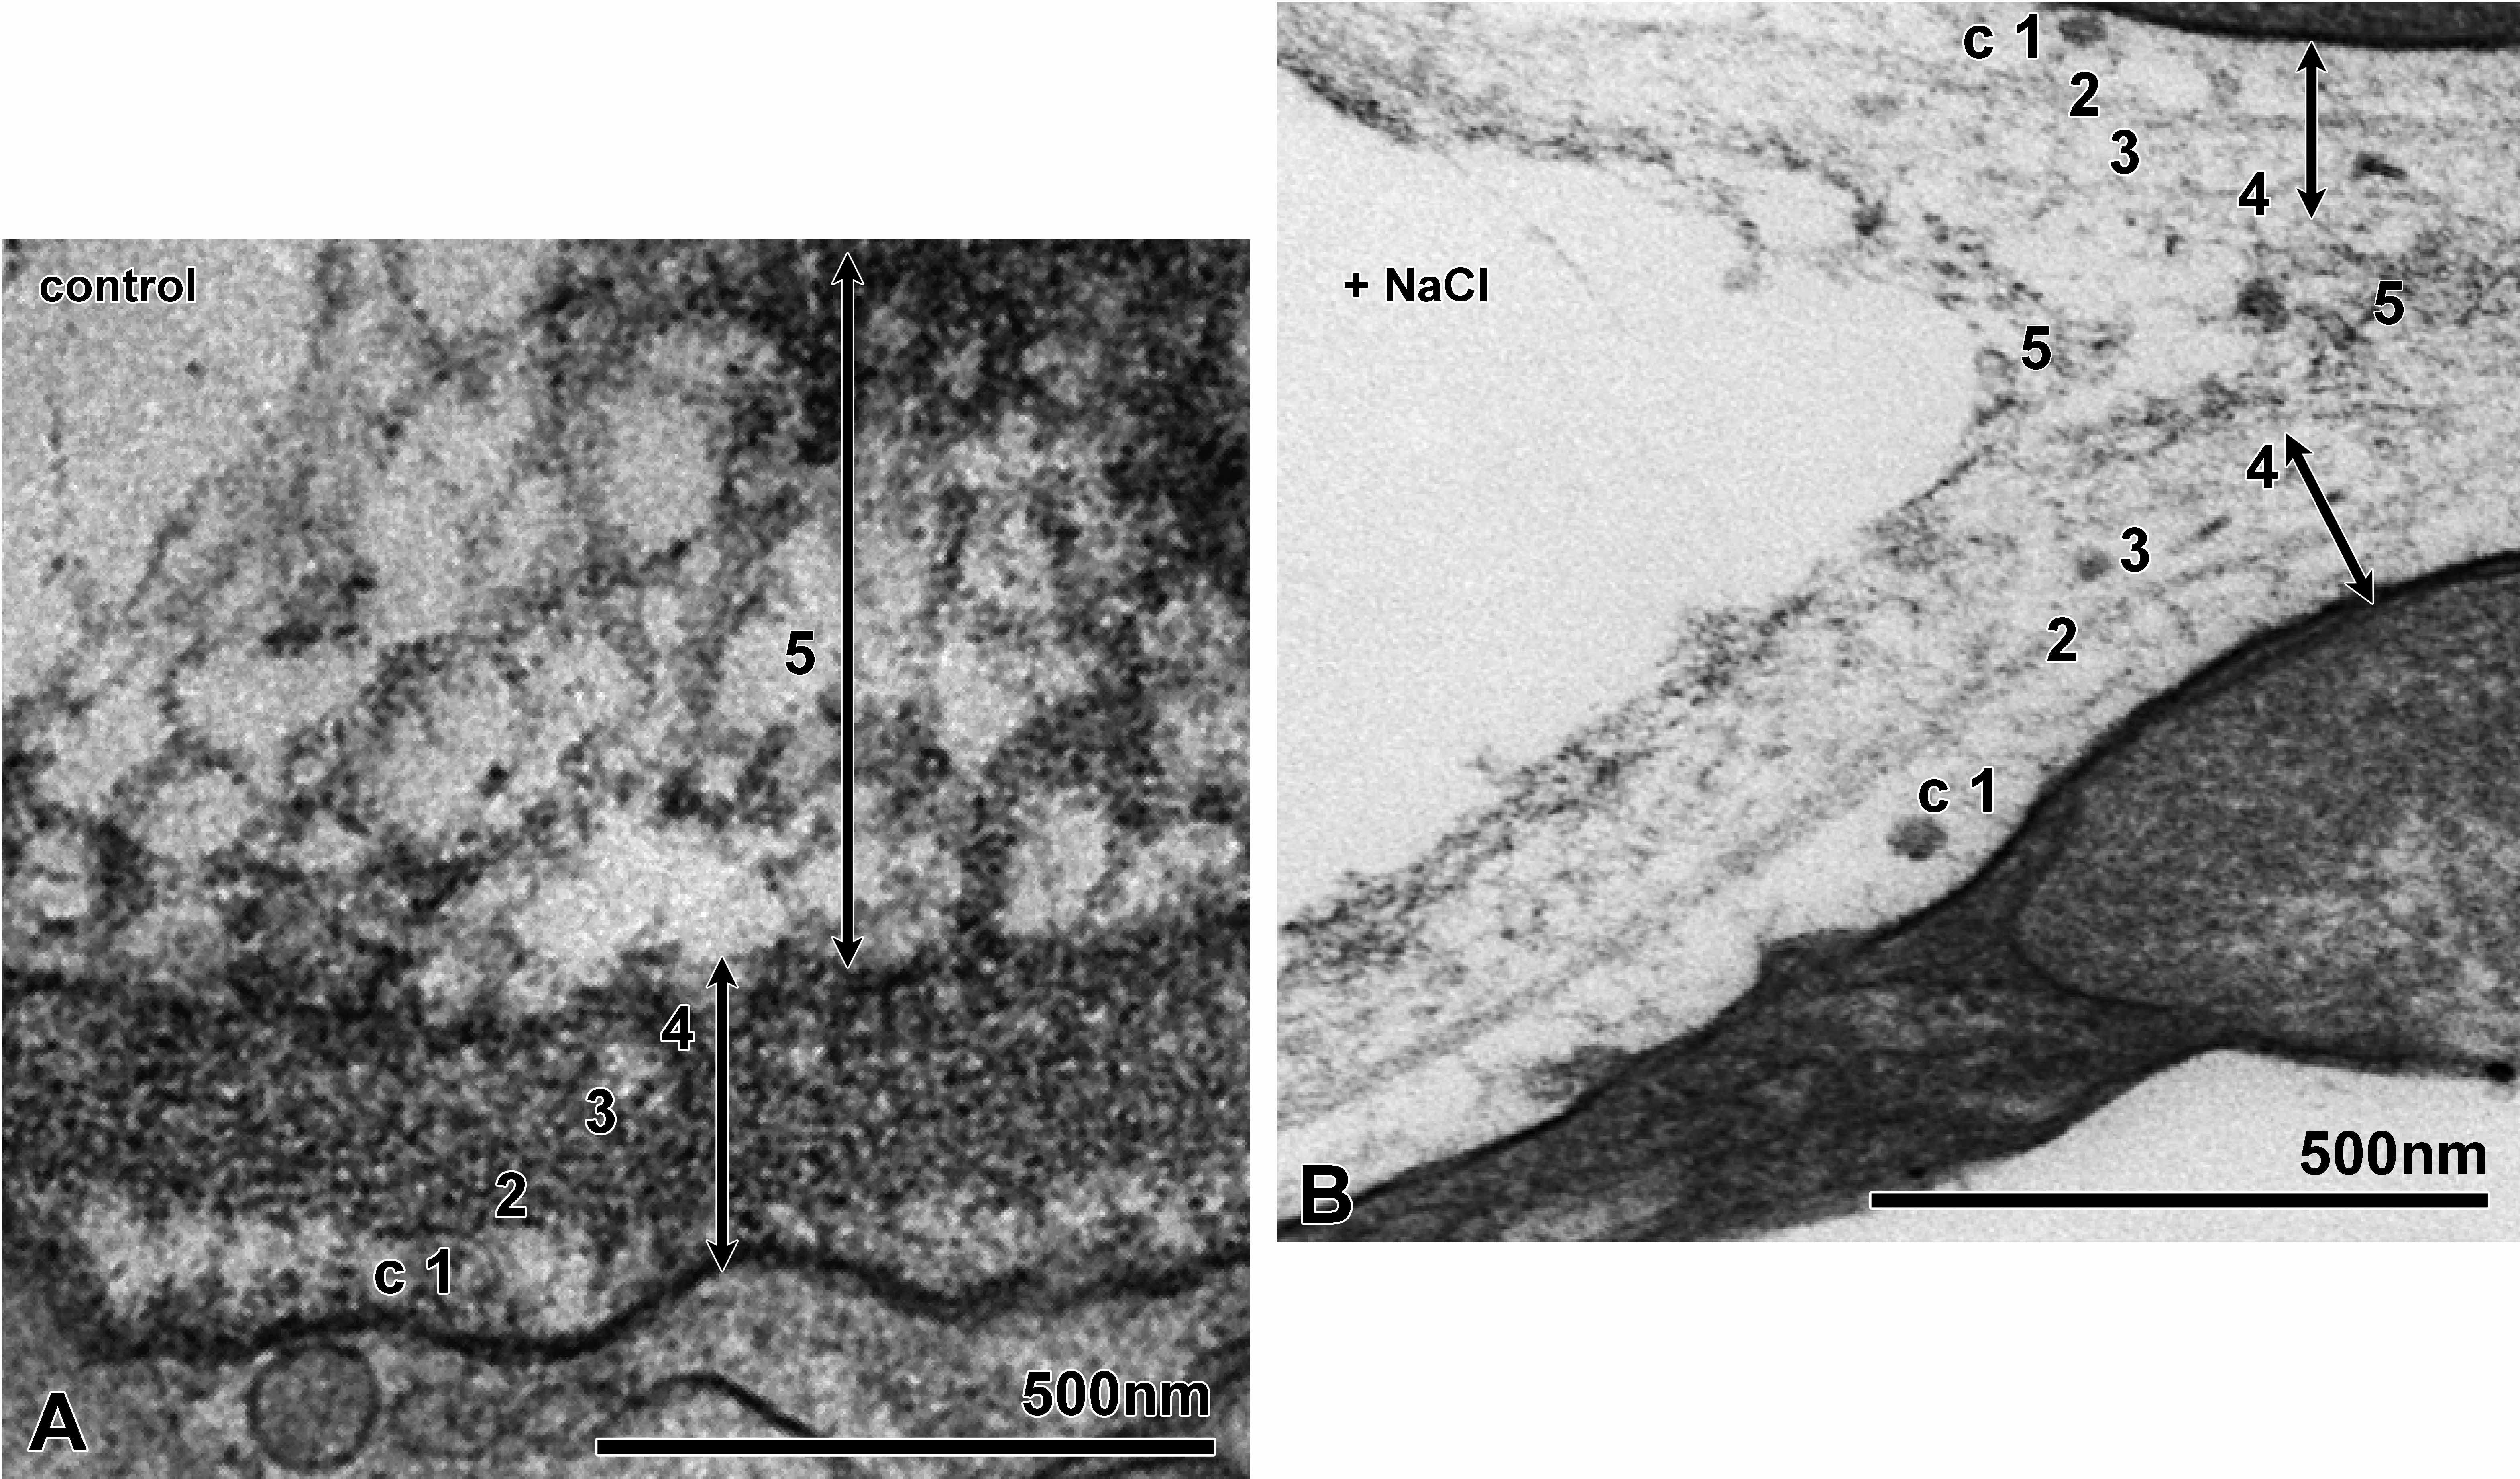

Supplement: Supplementary file 1 [file 1 › Figure_S1.jpeg]

Fig. S2: Anti-PPOD Antibody Test

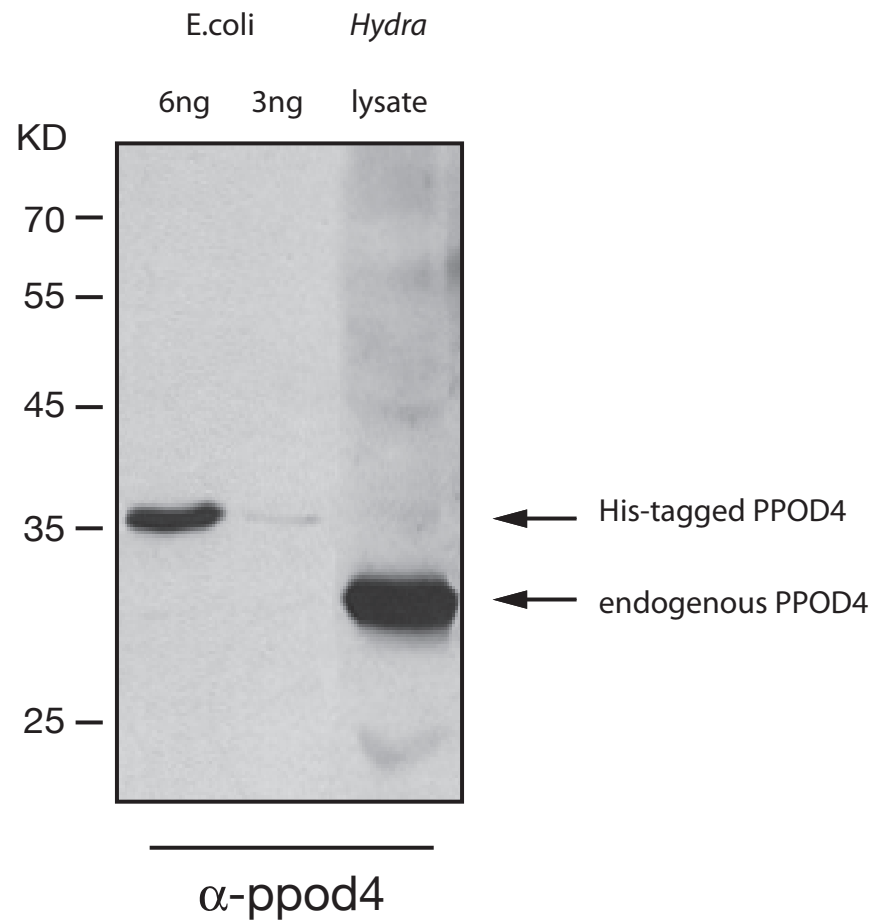

Supplement: Supplementary file 1 [file 1 › Figure_S2.pdf]

Fig. S3: Peroxidase Assay

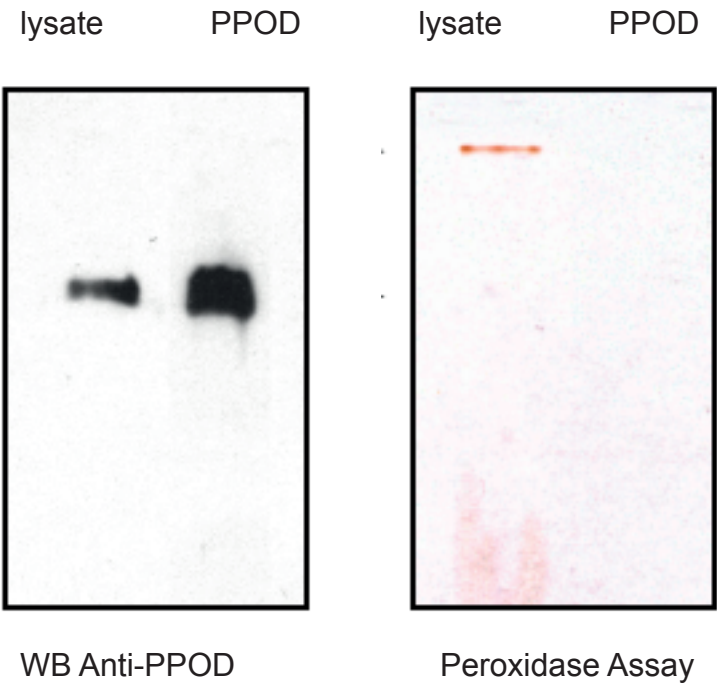

Supplement: Supplementary file 1 [file 1 › Figure_S3.pdf]

Fig. S5: PPOD Comparative Structural Model

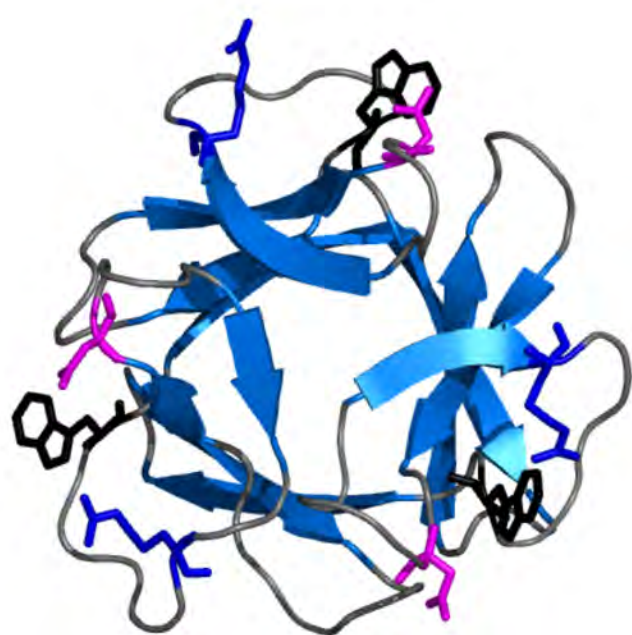

PPOD-model

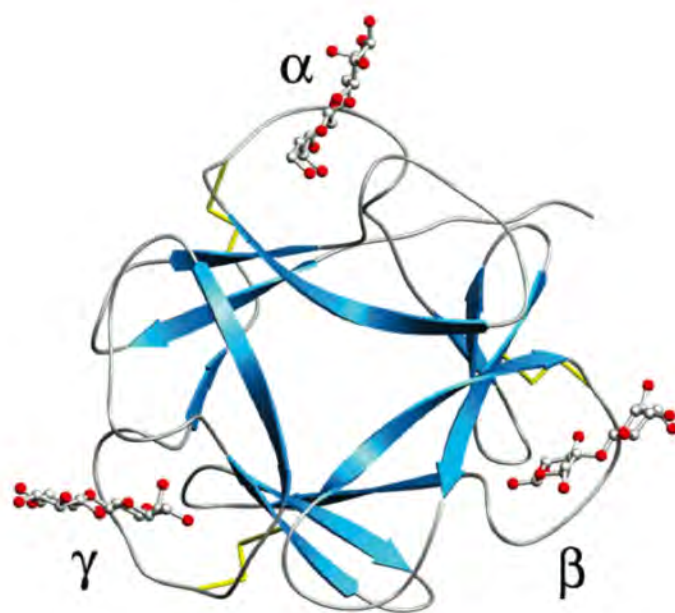

Xylanase 10A *Streptomyces lividans*

Supplement: Supplementary file 1 [file 1 › Figure_S5.pdf]
